# Supplementary material for: Valuation of provisioning ecosystem services and household dependency for livelihood: Empirical evidence from a tropical dry forest, India
Source: Research Square preprint supplement (doi:10.21203/rs.3.rs-2515857/v1), 2023-02-03

**Table 1** Seasonal calendar of collection of various provisioning ecosystem services (PES) and their use categories in Vindhyan highlands, India

| PES | | Month | | | | | | | | | | | | | | | | | | | | | |
| --- | --- | --- | --- | --- | --- | --- | --- | --- | --- | --- | --- | --- | --- | --- | --- | --- | --- | --- | --- | --- | --- | --- | --- |
| Jan | Feb | | Mar | | Apr | | May | | Jun | | Jul | | Aug | | Sept | | Oct | | Nov | | Dec |
| **Oil seeds** | | | | | | | | | | | | | | | | | | | | | | | |
| *Azadirachta indica* A. Juss. | |  | | | | |  | |  | |  | | | | | | | | | | | | |
| *Hyptis suaveolens* L. Poit. | |  | | | | | | | | | | | | | | |  | |  | |  | | |
| *Madhuca longifolia* (J. Koenig ex L.) J.F. Macbr. (Seed) | |  | | | | | | |  | |  | |  | | | | | | | | | | |
| *Pongamia pinnata* (L.) Pierre | |  |  | |  | |  | | | | | | | | | | | | | | | | |
| *Shorea robusta* Gaertn. (Seed) | |  |  | |  | |
| **Wild edibles** | | | | | | | | | | | | | | | | | | | | | | | |
| *Aegle marmelos* L. Correa | |  | | | | |  | |  | |  | |  | | | | | | | | | | |
| *Agaricus campestris* (L. ex Fr.) | |  | | | | | | | | | | |  | |  | |  | |  | | | | |
| *Buchanania lanzan* Spr. | |  | | | | |  | |  | |  | | | | | | | | | | | | |
| *Cassia tora* L. | |  | | | | | | | | | | |  | |  | |  | | | | | | |
| *Emblica officinalis* Gaertn. | |  |  | | | | | | | | | | | | | | | | | | | |  |
| *Madhuca longifolia* (J. Koenig ex L.) J.F. Macbr. (Fruit) | |  | | |  | |  | |  | | | | | | | | | | | | | | |
| *Mangifera indica* L. | |  | | | | | | |  | |  | |  | |  | |  | | | | | | |
| *Semecarpus anacardium* L. F. | |  |  | |  | | | | | | | | | | | | | | | | | |  |
| *Syzygium cumini* (L.) Skeels | |  | | | | | | | | | | |  | |  | |  | | | | | | |
| PES | Month | | | | | | | | | | | | | | | | | | | | | | |
| Jan | | | Feb | | Mar | | Apr | | May | | Jun | | Jul | | Aug | | Sept | | Oct | | Nov | Dec |
| *Tamarindus indica* L. |  | | | | | | | | |  | |  | |  | | | | | | | | | |
| *Zizyphus nummularia* (Burm. F.) Wgt. & Arn. |  | | |  | |  | |  | |  | | | | | | | | | | | | | |
| **Resins** | | | | | | | | | | | | | | | | | | | | | | | |
| *Anogeissus latifolia* (Roxb. ex DC.) Wall. ex Bedd. |  | | | | | | | | | | |  | |  | |  | | | | | | | |
| *Boswellia serrata* Roxb. ex Colebr. |  | | | | |  | |  | |  | |  | |  | | | | | | | | | |
| Fuelwood |  | | | | | | | | | | | | | | | | | | | | | | |
| Fuelwood |  | | |  | |  | |  | |  | |  | |  | |  | |  | |  | |  |  |
| **Fodder** |  | | | | | | | | | | | | | | | | | | | | | | |
| Fodder |  | | |  | |  | |  | |  | |  | | | |  | |  | |  | | | |
| **Medicine** |  | | | | | | | | | | | | | | | | | | | | | | |
| *Abrus precatorious* L. |  | | | | | | | | | | | | | | |  | |  | |  | |  | |
| *Andrographis paniculata* (Burm. F.) Wallich Ex. Nees |  | | |  | | | | | | | | | | | | | | | | | |  |  |
| *Asparagus recemosus* Willd. |  | | |  | |  | |  | | | | | | | | | | | | | | |  |
| *Bombax ceiba* L. |  | | |  | |  | |  | | | | | | | | | | | | | | | |
| *Butea monosperma* Lam. Taub. |  | | | | |  | |  | |  | | | | | | | | | | | | | |
| *Cyperus longus* L. |  | | | | | | | | | | | | | | |  | |  | |  | |  | |
| *Cyperus rotundus* L. |  | | | | | | | | | | | | | | | | |  | |  | |
| *Helicteres isora* L. |  | | | | | | | | | | | | | | |  | |  | |  | | | |
| PES | Month | | | | | | | | | | | | | | | | | | | | | | |
| Jan | | | Feb | | Mar | | Apr | | May | | Jun | | Jul | | Aug | | Sept | | Oct | | Nov | Dec |
| *Operculina turpethum* L. S. Manso |  | | | | |  | |  | |  | |  | | | | | | | | | | | |
| *Terminalia bellirica* (Gaertn.) Roxb. |  | | |  | |  | |  | | | | | | | | | | | | | | | |
| *Terminalia chebula* Retz. |  | | |  | |  | |
| *Woodfordia fruticosa* (L.) Kurz. |  | | |  | |  | |
| **Leaf** | | | | | | | | | | | | | | | | | | | | | | | |
| *Bauhinia vahlii* Wgt. & Arn. |  | | |  | |  | |  | | | | | | | | | | | |  | |  |  |
| *Diospyros melanoxylon* Roxb. |  | | | | | | | | |  | |  | |  | | | | | | | | | |
| *Shorea robusta* Gaertn. (Leaf) |  | | | | | | |  | |  | |  | |

Categories


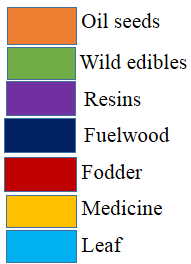

Supplement: Supplementary file 1 [file dec8e3a5f0e3772b62018f58.docx]
